# Supplementary material for: Chitosan Covalently Functionalized with Peptides Mapped on Vitronectin and BMP-2 for Bone Tissue Engineering
Source: MDPI journal article supplement (doi:10.3390/nano11112784), 2021-10-21
Supplement: s1 [file s1]

# Chitosan Covalently Functionalized with Peptides Mapped on Vitronectin and BMP-2 for Bone Tissue Engineering

Paola Brun <sup>1,†</sup>, Annj Zamuner <sup>2,3,†</sup>, Leonardo Cassari <sup>2</sup>, Gabriella D'Auria <sup>4</sup>, Lucia Falcigno <sup>4</sup>, Stefano Franchi <sup>5</sup>, Giorgio Contini <sup>5,6</sup>, Martina Marsotto <sup>7</sup>, Chiara Battocchio <sup>7</sup>, Giovanna Iucci <sup>7</sup> and Monica Dettin <sup>2,3,\*</sup>

<sup>1</sup> Department of Molecular Medicine, University of Padova, Via A. Gabelli 63, 35121 Padova, Italy; paola.brun.1@unipd.it

<sup>2</sup> Department of Industrial Engineering, University of Padova, Via F. Marzolo 9, 35131 Padova, Italy; annj.zamuner@unipd.it (A.Z.); leonardo.cassari@phd.unipd.it (L.C.)

<sup>3</sup> L.i.f.e.L.a.b. Program, Consorzio per la Ricerca Sanitaria (CORIS), Veneto Region, 35128 Padova, Italy

<sup>4</sup> Department of Pharmacy, University Federico II of Naples, Via Domenico Montesano 49, 80131 Naples, Italy; gabriella.dauria@unina.it (G.D.); falcigno@unina.it (L.F.)

<sup>5</sup> Istituto di Struttura Della Materia-CNR (ISM-CNR), Via Fosso del Cavaliere 100, 00133 Roma, Italy; stefano.franchi79@gmail.com (S.F.); giorgio.contini@ism.cnr.it (G.C.)

<sup>6</sup> Department of Physics, University of Rome Tor Vergata, Via Della Ricerca Scientifica 1, 00133 Roma, Italy

<sup>7</sup> Department of Science, Roma Tre University of Rome, Via Della Vasca Navale 79, Rome 00146, Italy; martina.marsotto@uniroma3.it (M.M.); giovanna.iucci@uniroma3.it (C.B.); giovanna.iucci@uniroma3.it (G.I.)

\* Correspondence: monica.dettin@unipd.it; Tel. +39-0498-2755-53

† These authors contributed equally to this study.

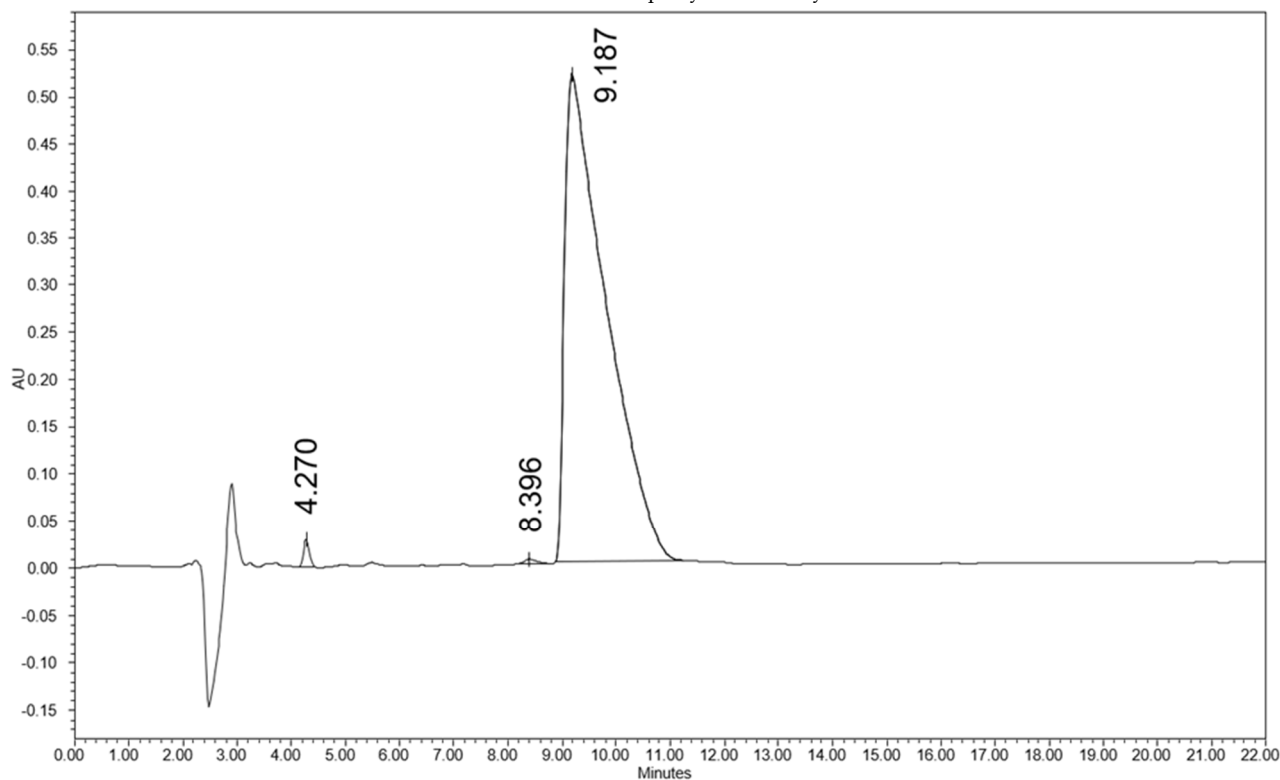

**Figure S1.** Analytical RP-HPLC chromatogram of purified S-X-HVP peptide. The analysis conditions were: Nova-Pak HR C<sub>18</sub> (4  $\mu$ m, 60  $\text{\AA}$ , 3.9  $\times$  300 mm, Waters), injection volume, 35  $\mu$ L of 1 mg/mL peptide solution; flow rate, 1 mL/min; eluent A, 0.05% TFA in water; eluent B, 0.05% TFA in CH<sub>3</sub>CN; gradient, from 13%B to 23%B in 20 min, detection at 214 nm. The retention time results 9.187 min.

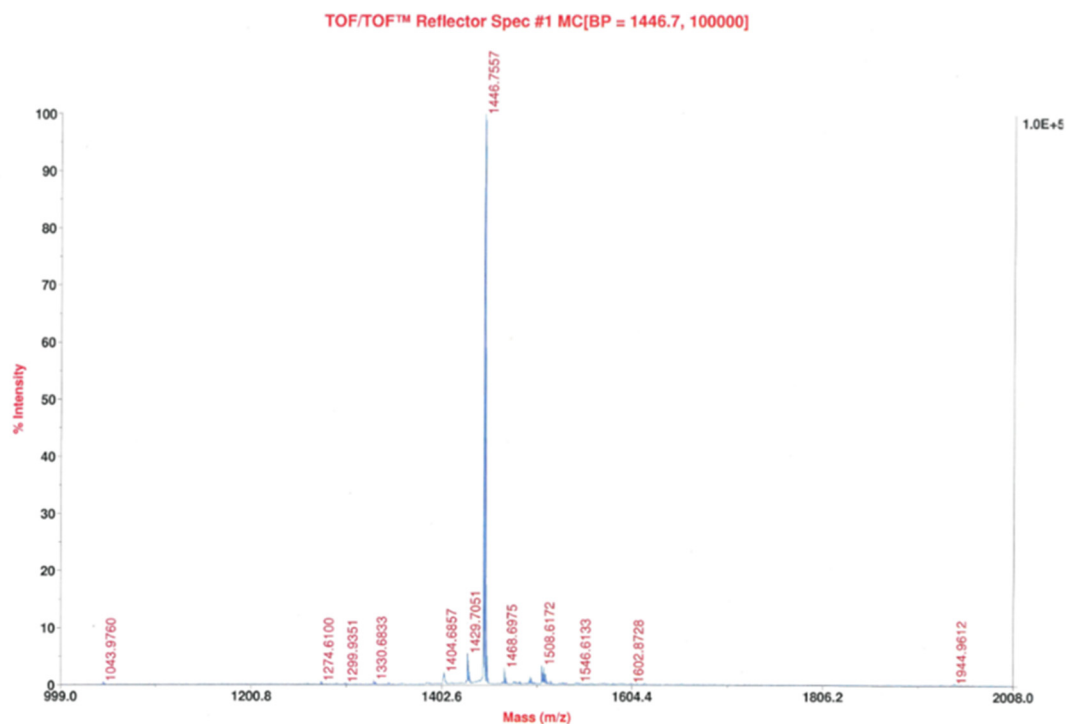

**Figure S2.** Mass analysis of S-X-HVP peptide. MALDI-TOF evaluation confirmed the identity of the purified peptide. S-X-HVP: experimental mass = 1446.7 Da, theoretical mass = 1446.6 Da.

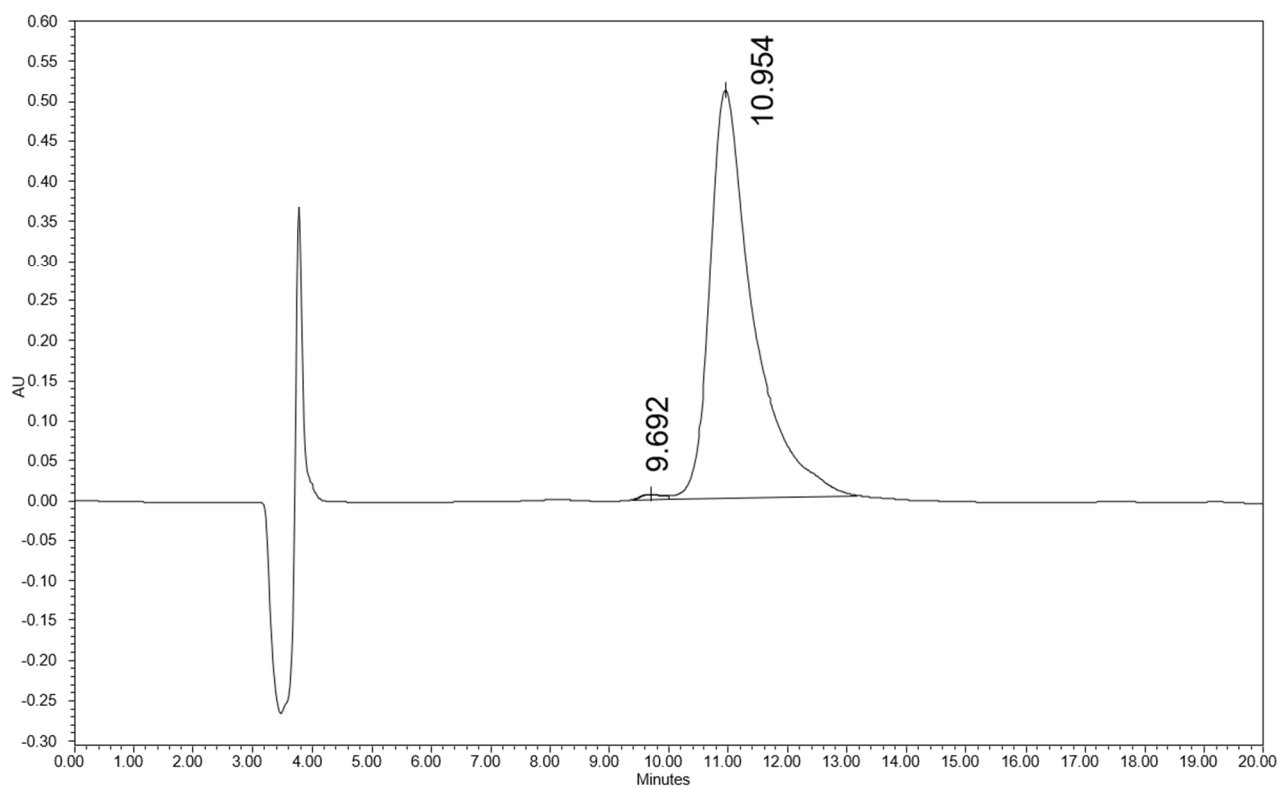

**Figure S3.** Analytical RP-HPLC chromatogram of purified GBMP1a. The analysis conditions were: Jupiter C<sub>18</sub> (5  $\mu$ m, 300 Å, 4.6  $\times$  250 mm, Phenomenex), injection volume, 100  $\mu$ L of 1 mg/mL peptide solution; flow rate, 1 mL/min; eluent A, 0.05% TFA in water; eluent B, 0.05% TFA in CH<sub>3</sub>CN; gradient, from 31%B to 41%B in 20 min, detection at 214 nm. The retention time results 10.954 min.

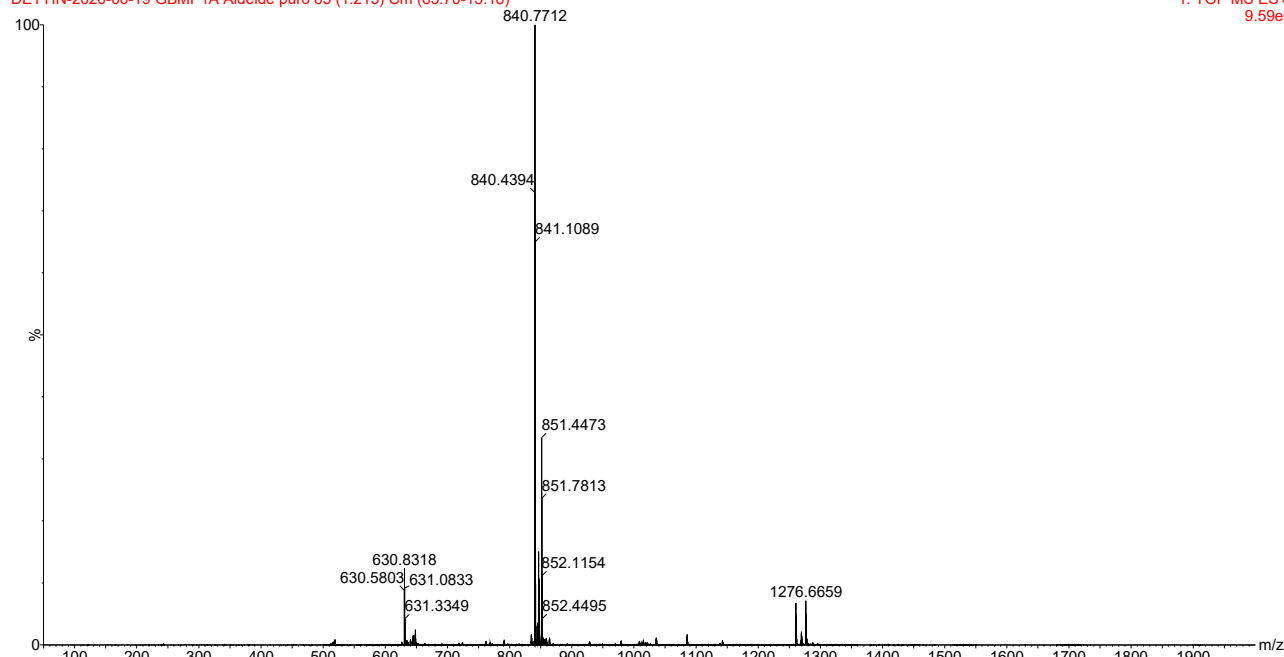

**Figure S4.** Mass analysis of GBMP1a peptide. ESI-TOF evaluation confirmed the identity of the purified peptide. GBMP1a: experimental mass deconvolution = 2519.3 Da, theoretical mass = 2519.8 Da.

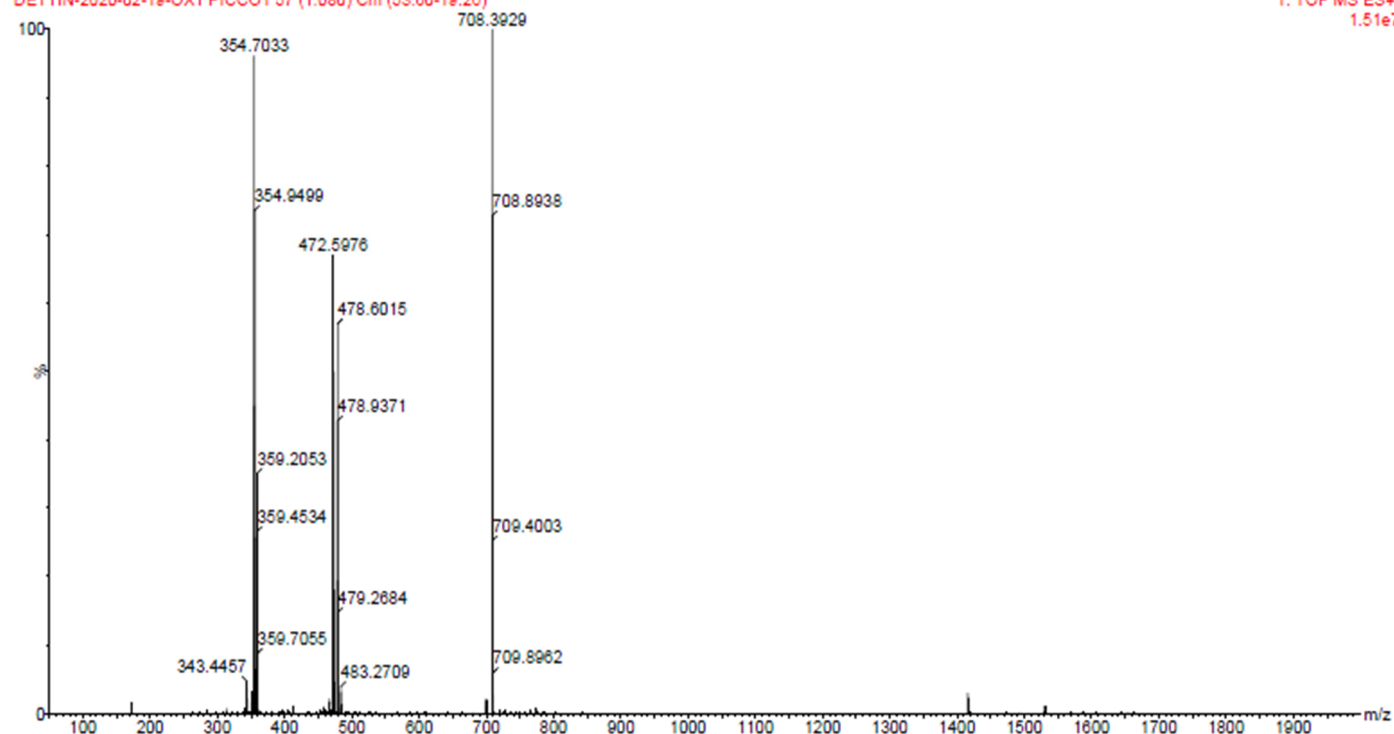

**Figure S5.** Mass analysis of ald-X-HVP peptide. ESI-TOF evaluation confirmed the identity of the purified peptide. Ald-X-HVP: experimental mass = 1414.8 Da, theoretical mass = 1415.6 Da.
